# Supplementary material
Source: Springer Nature journal article supplement (https://www.springermedizin.de/resource/supplementary/12936_2010_1647_MOESM2_ESM.pdf/9542252)

# 21,312 ICSRs suspecting anti-malarials reported

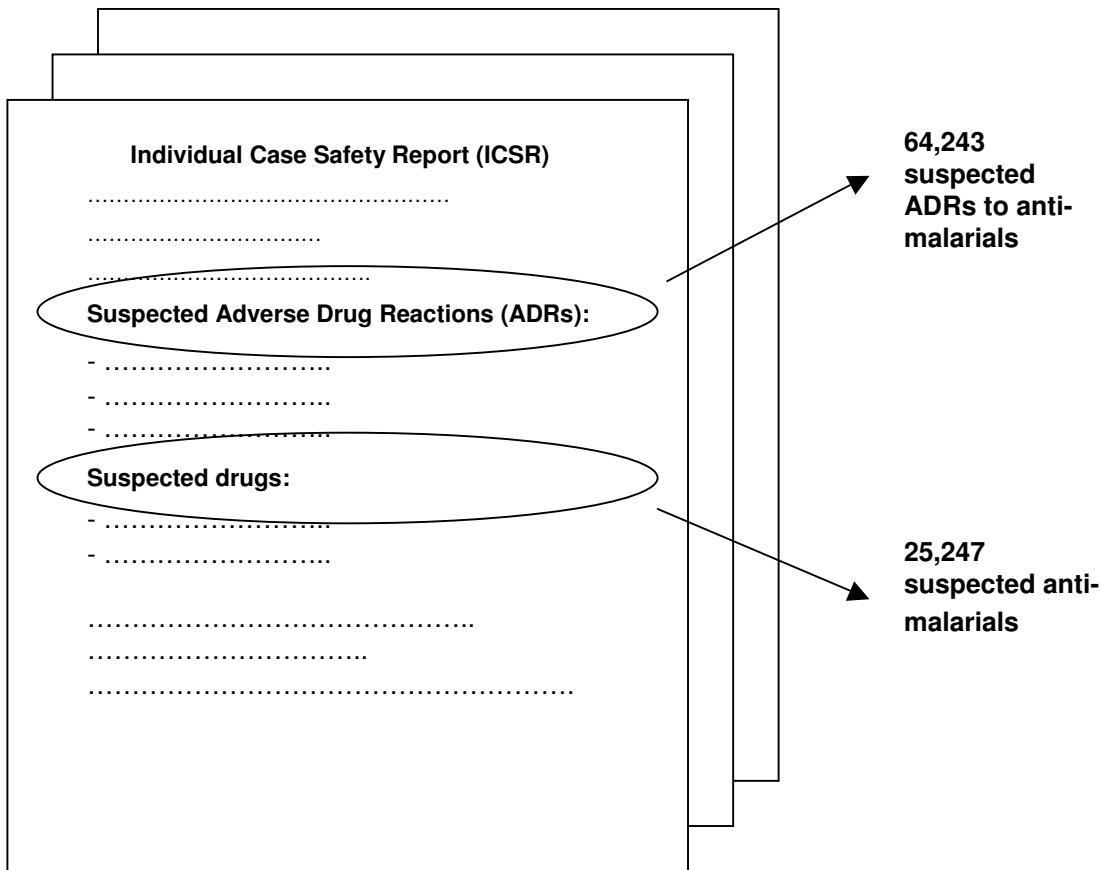

Supplement: MOESM2 [file 9542252]
